# Supplementary material for: Developmental vascular regression is regulated by a Wnt/β-catenin, MYC, P21 (CDKN1A) pathway that controls cell proliferation and cell death
Source: Oxford University Press journal article supplement (doi:10.1242/dev.154898), 2018-01-01
Supplement: dev154898supp.pdf [file dev154898supp.pdf]

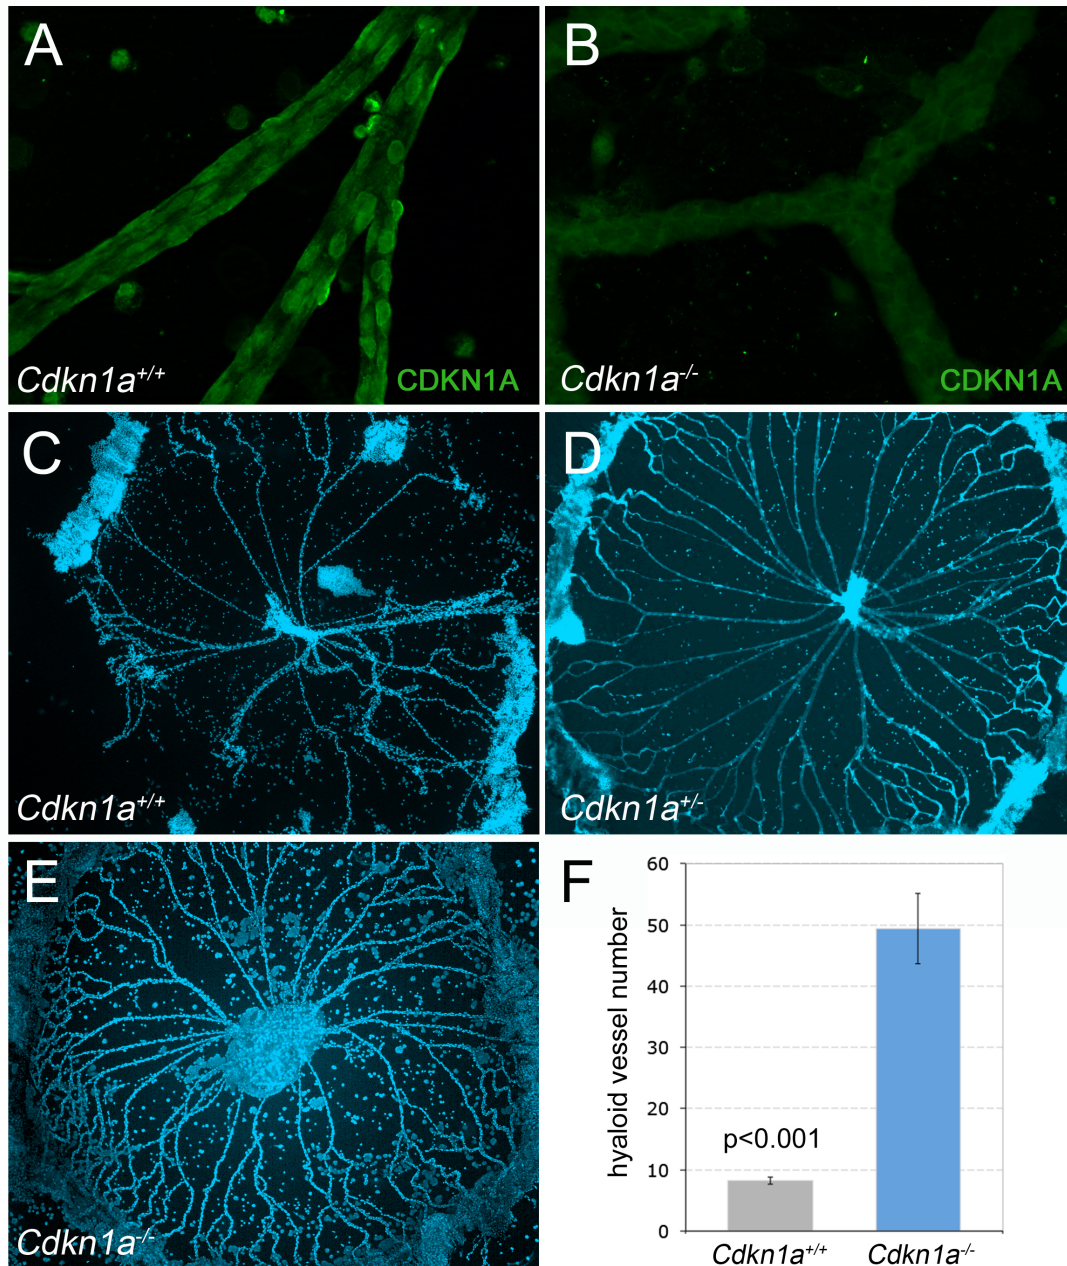

**Supplemental Figure S1: CDKN1A is expressed in hyaloid vessels and the protein is necessary for timely regression of the hyaloid vessel bed.** (A, B) CDKN1A antibody labeling of hyaloid vessels from wild-type (A) and *Cdkn1a*<sup>-/-</sup> mice (B). (C-E) Representative flat-mounted hyaloid preparations of P8 wild-type (C), *Cdkn1a*<sup>+/-</sup> (D) and *Cdkn1a*<sup>-/-</sup> (E) mice. Loss of CDKN1A results in hyaloid persistence. (F) Quantification of hyaloid vessel numbers of P8 wild-type and *Cdkn1a*<sup>-/-</sup> mice. Error bars represent S.E.M.
